# Supplementary material
Source: ML conference proceedings conference paper supplement (https://proceedings.mlr.press/v89/vaswani19a.html)
Supplement: Supplementary file [file vaswani19a-supp.pdf]

## A Incorporating additive error for Nesterov acceleration

For this section, we assume an additive error in the the strong growth condition implying that the following equation is satisfied for all  $w, z$ .

$$\mathbb{E}_z \|\nabla f(w, z)\|^2 \leq \rho \|\nabla f(w)\|^2 + \sigma^2$$

In this case, we have the counterparts of Theorems 1 and 2 as follows:

**Theorem 7** (Strongly convex). *Under  $L$ -smoothness and  $\mu$  strongly-convexity, if  $f$  satisfies SGC with constant  $\rho$  and an additive error  $\sigma$ , then SGD with Nesterov acceleration with the following choice of parameters,*

$$\begin{aligned} \gamma_k &= \frac{1}{\sqrt{\mu\eta\rho}} \quad ; \quad \beta_k = 1 - \sqrt{\frac{\mu\eta}{\rho}} \\ b_{k+1} &= \frac{\sqrt{\mu}}{\left(1 - \sqrt{\frac{\mu\eta}{\rho}}\right)^{(k+1)/2}} \\ a_{k+1} &= \frac{1}{\left(1 - \sqrt{\frac{\mu\eta}{\rho}}\right)^{(k+1)/2}} \\ \alpha_k &= \frac{\gamma_k \beta_k b_{k+1}^2 \eta}{\gamma_k \beta_k b_{k+1}^2 \eta + a_k^2}; \quad \eta = \frac{1}{\rho L} \end{aligned}$$

results in the following convergence rate:

$$[\mathbb{E}[f(w_{k+1})] - f(w^*)] \leq \left(1 - \sqrt{\frac{\mu\eta}{\rho}}\right)^k \left[ f(x_0) - f(w^*) + \frac{\mu}{2} \|x_0 - w^*\|^2 \right] + \frac{\sigma^2 \sqrt{\eta}}{\sqrt{\rho\mu}}$$

**Theorem 8** (Convex). *Under  $L$ -smoothness and convexity, if  $f$  satisfies SGC with constant  $\rho$  and an additive error  $\sigma$ , then SGD with Nesterov acceleration with the following choice of parameters,*

$$\begin{aligned} \gamma_k &= \frac{\frac{1}{\rho} + \sqrt{\frac{1}{\rho^2} + 4\gamma_{k-1}^2}}{2} \\ a_{k+1} &= \gamma_k \sqrt{\eta\rho} \\ \alpha_k &= \frac{\gamma_k \eta}{\gamma_k \eta + a_k^2}; \quad \eta = \frac{1}{\rho L} \end{aligned}$$

results in the following convergence rate:

$$[\mathbb{E}f(w_{k+1}) - f(w^*)] \leq \frac{2\rho}{k^2\eta} \|x_0 - w^*\|^2 + \frac{k\sigma^2\eta}{\rho}$$

The above theorems are proved in appendices B.1.1 and B.1.3

## B Proofs

### B.1 Proofs for SGD with Nesterov Acceleration

Recall the update equations for SGD with Nesterov acceleration as follows:

$$\begin{aligned} w_{k+1} &= \zeta_k - \eta \nabla f(\zeta_k, z_k) \\ \zeta_k &= \alpha_k v_k + (1 - \alpha_k) w_k \\ v_{k+1} &= \beta_k v_k + (1 - \beta_k) \zeta_k - \gamma_k \eta \nabla f(\zeta_k, z_k) \end{aligned}$$

Since the stochastic gradients are unbiased, we obtain the following equation,

$$\mathbb{E}_z [\nabla f(y, z)] = \nabla f(y) \quad (9)$$

For the proof, we consider the more general strong-growth condition with an additive error  $\sigma^2$ .

$$\mathbb{E}_z \|\nabla f(w, z)\|^2 \leq \rho \|\nabla f(w)\|^2 + \sigma^2 \quad (10)$$

We choose the parameters  $\gamma_k, \alpha_k, \beta_k, a_k, b_k$  such that the following equations are satisfied:

$$\gamma_k = \frac{1}{\rho} \cdot \left[ 1 + \frac{\beta_k(1 - \alpha_k)}{\alpha_k} \right] \quad (11)$$

$$\alpha_k = \frac{\gamma_k \beta_k b_{k+1}^2 \eta}{\gamma_k \beta_k b_{k+1}^2 \eta + a_k^2} \quad (12)$$

$$\beta_k \geq 1 - \gamma_k \mu \eta \quad (13)$$

$$a_{k+1} = \gamma_k \sqrt{\eta \rho} b_{k+1} \quad (14)$$

$$b_{k+1} \leq \frac{b_k}{\sqrt{\beta_k}} \quad (15)$$

We now prove the following lemma assuming that the function  $f(\cdot)$  is  $L$ -smooth and  $\mu$  strongly-convex.

**Lemma 3.** *Assume that the function is  $L$ -smooth and  $\mu$  strongly-convex and satisfies the strong-growth condition in Equation 10. Then, using the updates in Equation 3-5 and setting the parameters according to Equations 11-15, if  $\eta \leq \frac{1}{\rho L}$ , then the following relation holds:*

$$b_{k+1}^2 \gamma_k^2 [\mathbb{E} f(w_{k+1}) - f^*] \leq \frac{a_0^2}{\rho \eta} [f(x_0) - f^*] + \frac{b_0^2}{2\rho \eta} \|x_0 - w^*\|^2 + \frac{\sigma^2 \eta}{\rho} \sum_{i=0}^k [\gamma_i^2 b_{i+1}^2]$$

*Proof.*

Let  $r_{k+1} = \|v_{k+1} - w^*\|$ , then using equation 5

$$\begin{aligned} r_{k+1}^2 &= \|\beta_k v_k + (1 - \beta_k) \zeta_k - w^* - \gamma_k \eta \nabla f(\zeta_k, z_k)\|^2 \\ r_{k+1}^2 &= \|\beta_k v_k + (1 - \beta_k) \zeta_k - w^*\|^2 + \gamma_k^2 \eta^2 \|\nabla f(\zeta_k, z_k)\|^2 + 2\gamma_k \eta \langle w^* - \beta_k v_k - (1 - \beta_k) \zeta_k, \nabla f(\zeta_k, z_k) \rangle \end{aligned}$$

Taking expectation wrt to  $z_k$ ,

$$\begin{aligned} \mathbb{E}[r_{k+1}^2] &= \mathbb{E}[\|\beta_k v_k + (1 - \beta_k) \zeta_k - w^*\|^2] + \gamma_k^2 \eta^2 \mathbb{E} \|\nabla f(\zeta_k, z_k)\|^2 + 2\gamma_k \eta \mathbb{E} \langle w^* - \beta_k v_k - (1 - \beta_k) \zeta_k, \nabla f(\zeta_k, z_k) \rangle \\ &\leq \|\beta_k v_k + (1 - \beta_k) \zeta_k - w^*\|^2 + \gamma_k^2 \eta^2 \rho \|\nabla f(\zeta_k)\|^2 + 2\gamma_k \eta \langle w^* - \beta_k v_k - (1 - \beta_k) \zeta_k, \nabla f(\zeta_k) \rangle + \gamma_k^2 \eta^2 \sigma^2 \\ &= \|\beta_k (v_k - w^*) + (1 - \beta_k) (\zeta_k - w^*)\|^2 + \gamma_k^2 \eta^2 \rho \|\nabla f(\zeta_k)\|^2 + 2\gamma_k \eta \langle w^* - \beta_k v_k - (1 - \beta_k) \zeta_k, \nabla f(\zeta_k) \rangle + \gamma_k^2 \eta^2 \sigma^2 \\ &\leq \beta_k \|v_k - w^*\|^2 + (1 - \beta_k) \|\zeta_k - w^*\|^2 + \gamma_k^2 \eta^2 \rho \|\nabla f(\zeta_k)\|^2 + 2\gamma_k \eta \langle w^* - \beta_k v_k - (1 - \beta_k) \zeta_k, \nabla f(\zeta_k) \rangle + \gamma_k^2 \eta^2 \sigma^2 \\ &\hspace{15em} \text{(By convexity of } \|\cdot\|^2 \text{)} \\ &= \beta_k r_k^2 + (1 - \beta_k) \|\zeta_k - w^*\|^2 + \gamma_k^2 \eta^2 \rho \|\nabla f(\zeta_k)\|^2 + 2\gamma_k \eta \langle w^* - \beta_k v_k - (1 - \beta_k) \zeta_k, \nabla f(\zeta_k) \rangle + \gamma_k^2 \eta^2 \sigma^2 \\ &= \beta_k r_k^2 + (1 - \beta_k) \|\zeta_k - w^*\|^2 + \gamma_k^2 \eta^2 \rho \|\nabla f(\zeta_k)\|^2 + 2\gamma_k \eta \langle \beta_k (\zeta_k - v_k) + w^* - \zeta_k, \nabla f(\zeta_k) \rangle + \gamma_k^2 \eta^2 \sigma^2 \\ &= \beta_k r_k^2 + (1 - \beta_k) \|\zeta_k - w^*\|^2 + \gamma_k^2 \eta^2 \rho \|\nabla f(\zeta_k)\|^2 + 2\gamma_k \eta \left[ \left\langle \frac{\beta_k(1 - \alpha_k)}{\alpha_k} (w_k - \zeta_k) + w^* - \zeta_k, \nabla f(\zeta_k) \right\rangle \right] + \gamma_k^2 \eta^2 \sigma^2 \\ &\hspace{15em} \text{(From equation 4)} \\ &= \beta_k r_k^2 + (1 - \beta_k) \|\zeta_k - w^*\|^2 + \gamma_k^2 \eta^2 \rho \|\nabla f(\zeta_k)\|^2 + 2\gamma_k \eta \left[ \frac{\beta_k(1 - \alpha_k)}{\alpha_k} \langle \nabla f(\zeta_k), (w_k - \zeta_k) \rangle + \langle \nabla f(\zeta_k), w^* - \zeta_k \rangle \right] + \gamma_k^2 \eta^2 \sigma^2 \\ &\leq \beta_k r_k^2 + (1 - \beta_k) \|\zeta_k - w^*\|^2 + \gamma_k^2 \eta^2 \rho \|\nabla f(\zeta_k)\|^2 + 2\gamma_k \eta \left[ \frac{\beta_k(1 - \alpha_k)}{\alpha_k} (f(w_k) - f(\zeta_k)) + \langle \nabla f(\zeta_k), w^* - \zeta_k \rangle \right] + \gamma_k^2 \eta^2 \sigma^2 \\ &\hspace{15em} \text{(By convexity)} \end{aligned}$$

By strong convexity,

$$\begin{aligned} \mathbb{E}[r_{k+1}^2] &\leq \beta_k r_k^2 + (1 - \beta_k) \|\zeta_k - w^*\|^2 + \gamma_k^2 \eta^2 \rho \|\nabla f(\zeta_k)\|^2 \\ &\quad + 2\gamma_k \eta \left[ \frac{\beta_k(1 - \alpha_k)}{\alpha_k} (f(w_k) - f(\zeta_k)) + f^* - f(\zeta_k) - \frac{\mu}{2} \|\zeta_k - w^*\|^2 \right] + \gamma_k^2 \eta^2 \sigma^2 \end{aligned} \quad (16)$$

By Lipschitz continuity of the gradient,

$$\begin{aligned} f(w_{k+1}) - f(\zeta_k) &\leq \langle \nabla f(\zeta_k), w_{k+1} - \zeta_k \rangle + \frac{L}{2} \|w_{k+1} - \zeta_k\|^2 \\ &\leq -\eta \langle \nabla f(\zeta_k), \nabla f(\zeta_k, z_k) \rangle + \frac{L\eta^2}{2} \|\nabla f(\zeta_k, z_k)\|^2 \end{aligned}$$

Taking expectation wrt  $z_k$  and using equations 9, 10

$$\begin{aligned} \mathbb{E}[f(w_{k+1}) - f(\zeta_k)] &\leq -\eta \|\nabla f(\zeta_k)\|^2 + \frac{L\rho\eta^2}{2} \|\nabla f(\zeta_k)\|^2 + \frac{L\eta^2\sigma^2}{2} \\ \mathbb{E}[f(w_{k+1}) - f(\zeta_k)] &\leq \left[ -\eta + \frac{L\rho\eta^2}{2} \right] \|\nabla f(\zeta_k)\|^2 + \frac{L\eta^2\sigma^2}{2} \end{aligned}$$

If  $\eta \leq \frac{1}{\rho L}$ ,

$$\begin{aligned} \mathbb{E}[f(w_{k+1}) - f(\zeta_k)] &\leq \left( \frac{-\eta}{2} \right) \|\nabla f(\zeta_k)\|^2 + \frac{L\eta^2\sigma^2}{2} \\ \implies \|\nabla f(\zeta_k)\|^2 &\leq \left( \frac{2}{\eta} \right) \mathbb{E}[f(\zeta_k) - f(w_{k+1})] + L\eta\sigma^2 \end{aligned} \quad (17)$$

From equations 16 and 17,

$$\begin{aligned} \mathbb{E}[r_{k+1}^2] &\leq \beta_k r_k^2 + (1 - \beta_k) \|\zeta_k - w^*\|^2 + 2\gamma_k^2 \rho \eta \mathbb{E}[f(\zeta_k) - f(w_{k+1})] \\ &\quad + 2\gamma_k \eta \left[ \frac{\beta_k(1 - \alpha_k)}{\alpha_k} (f(w_k) - f(\zeta_k)) + f^* - f(\zeta_k) - \frac{\mu}{2} \|\zeta_k - w^*\|^2 \right] + \gamma_k^2 \eta^2 \sigma^2 + L\gamma_k^2 \eta^3 \rho \sigma^2 \\ &\leq \beta_k r_k^2 + (1 - \beta_k) \|\zeta_k - w^*\|^2 + 2\gamma_k^2 \eta \rho \mathbb{E}[f(\zeta_k) - f(w_{k+1})] \\ &\quad + 2\gamma_k \eta \left[ \frac{\beta_k(1 - \alpha_k)}{\alpha_k} (f(w_k) - f(\zeta_k)) + f^* - f(\zeta_k) - \frac{\mu}{2} \|\zeta_k - w^*\|^2 \right] + 2\gamma_k^2 \eta^2 \sigma^2 \quad (\text{Since } \eta \leq \frac{1}{\rho L}) \\ &= \beta_k r_k^2 + \|\zeta_k - w^*\|^2 [(1 - \beta_k) - \gamma_k \mu \eta] + f(\zeta_k) \left[ 2\gamma_k^2 \eta \rho - 2\gamma_k \eta \cdot \frac{\beta_k(1 - \alpha_k)}{\alpha_k} - 2\gamma_k \eta \right] \\ &\quad - 2\gamma_k^2 \eta \rho \mathbb{E}f(w_{k+1}) + 2\gamma_k \eta f^* + \left[ 2\gamma_k \eta \cdot \frac{\beta_k(1 - \alpha_k)}{\alpha_k} \right] f(w_k) + 2\gamma_k^2 \eta^2 \sigma^2 \end{aligned}$$

Since  $\beta_k \geq 1 - \gamma_k \mu \eta$  and  $\gamma_k = \frac{1}{\rho} \cdot \left( 1 + \frac{\beta_k(1 - \alpha_k)}{\alpha_k} \right)$ ,

$$\mathbb{E}[r_{k+1}^2] \leq \beta_k r_k^2 - 2\gamma_k^2 \eta \rho \mathbb{E}f(w_{k+1}) + 2\gamma_k \eta f^* + \left[ 2\gamma_k \eta \cdot \frac{\beta_k(1 - \alpha_k)}{\alpha_k} \right] f(w_k) + 2\gamma_k^2 \eta^2 \sigma^2$$

Multiplying by  $b_{k+1}^2$ ,

$$b_{k+1}^2 \mathbb{E}[r_{k+1}^2] \leq b_{k+1}^2 \beta_k r_k^2 - 2b_{k+1}^2 \gamma_k^2 \eta \rho \mathbb{E}f(w_{k+1}) + 2b_{k+1}^2 \gamma_k \eta f^* + \left[ 2b_{k+1}^2 \gamma_k \eta \cdot \frac{\beta_k(1 - \alpha_k)}{\alpha_k} \right] f(w_k) + 2b_{k+1}^2 \gamma_k^2 \eta^2 \sigma^2$$

Since  $b_{k+1}^2 \beta_k \leq b_k^2$ ,  $b_{k+1}^2 \gamma_k^2 \eta \rho = a_{k+1}^2$ ,  $\frac{\gamma_k \eta \beta_k (1 - \alpha_k)}{\alpha_k} = \frac{a_k^2}{b_{k+1}^2}$

$$\begin{aligned} b_{k+1}^2 \mathbb{E}[r_{k+1}^2] &\leq b_k^2 r_k^2 - 2a_{k+1}^2 \mathbb{E}f(w_{k+1}) + 2b_{k+1}^2 \gamma_k \eta f^* + 2a_k^2 f(w_k) + \frac{2a_{k+1}^2 \sigma^2 \eta}{\rho} \\ &= b_k^2 r_k^2 - 2a_{k+1}^2 [\mathbb{E}f(w_{k+1}) - f^*] + 2a_k^2 [f(w_k) - f^*] + 2 [b_{k+1}^2 \gamma_k \eta - a_{k+1}^2 + a_k^2] f^* + \frac{2a_{k+1}^2 \sigma^2 \eta}{\rho} \end{aligned}$$

Since  $[b_{k+1}^2 \gamma_k \eta - a_{k+1}^2 + a_k^2] = 0$ ,

$$b_{k+1}^2 \mathbb{E}[r_{k+1}^2] \leq b_k^2 r_k^2 - 2a_{k+1}^2 [\mathbb{E}f(w_{k+1}) - f^*] + 2a_k^2 [f(w_k) - f^*] + \frac{2a_{k+1}^2 \sigma^2 \eta}{\rho}$$

Denoting  $\mathbb{E}f(w_{k+1})$  as  $\phi_k$ ,

$$2a_{k+1}^2 [\phi_{k+1} - f^*] + b_{k+1}^2 \mathbb{E}[r_{k+1}^2] \leq 2a_k^2 [\phi_k - f^*] + b_k^2 \mathbb{E}[r_k^2] + \frac{2a_{k+1}^2 \sigma^2 \eta}{\rho}$$

By recursion,

$$\begin{aligned} 2a_{k+1}^2 [\phi_{k+1} - f^*] + b_{k+1}^2 \mathbb{E}[r_{k+1}^2] &\leq 2a_0^2 [f(x_0) - f^*] + b_0^2 \|x_0 - w^*\|^2 + \frac{2\sigma^2 \eta}{\rho} \sum_{i=0}^k [a_{i+1}^2] \\ 2a_{k+1}^2 [\phi_{k+1} - f^*] &\leq 2a_0^2 [f(x_0) - f^*] + b_0^2 \|x_0 - w^*\|^2 + \frac{2\sigma^2 \eta}{\rho} \sum_{i=0}^k [a_{i+1}^2] \\ 2b_{k+1}^2 \gamma_k^2 \rho \eta [\phi_{k+1} - f^*] &\leq 2a_0^2 [f(x_0) - f^*] + b_0^2 \|x_0 - w^*\|^2 + 2\sigma^2 \eta^2 \rho \sum_{i=0}^k [\gamma_i^2 b_{i+1}^2] \\ b_{k+1}^2 \gamma_k^2 [\mathbb{E}f(w_{k+1}) - f^*] &\leq \frac{a_0^2}{\rho \eta} [f(x_0) - f^*] + \frac{b_0^2}{2\rho \eta} \|x_0 - w^*\|^2 + \frac{\sigma^2 \eta}{\rho} \sum_{i=0}^k [\gamma_i^2 b_{i+1}^2] \end{aligned}$$

□

**Lemma 4.** Under the parameter setting according to Equations 11- 15, the following relation is true:

$$\gamma_k^2 - \gamma_k \left[ \frac{1}{\rho} - \mu \eta \gamma_{k-1}^2 \right] = \gamma_{k-1}^2$$

*Proof.*

$$\begin{aligned} \gamma_k &= \frac{1}{\rho} \left[ 1 + \frac{\beta_k (1 - \alpha_k)}{\alpha_k} \right] && \text{(From equation 11)} \\ \gamma_k^2 - \frac{\gamma_k}{\rho} &= \frac{\gamma_k \beta_k (1 - \alpha_k)}{\rho \alpha_k} \\ &= \frac{1}{\eta \rho} \frac{a_k^2}{b_{k+1}^2} && \text{(From equation 12)} \\ &= \frac{\beta_k}{\eta \rho} \frac{a_k^2}{b_k^2} && \text{(From equation 15)} \\ &= \frac{1 - \gamma_k \mu \eta}{\eta \rho} \frac{a_k^2}{b_k^2} && \text{(From equation 13)} \\ &= \frac{1 - \gamma_k \mu \eta}{\eta \rho} (\gamma_{k-1} \sqrt{\eta \rho})^2 && \text{(From equation 13)} \\ &= (1 - \gamma_k \mu \eta) \gamma_{k-1}^2 \\ \implies \gamma_k^2 - \gamma_k \left[ \frac{1}{\rho} - \mu \eta \gamma_{k-1}^2 \right] &= \gamma_{k-1}^2 && (18) \end{aligned}$$

□

### B.1.1 Strongly-convex case

We now consider the strongly-convex case,

Using Lemma 4,

$$\gamma_k^2 - \gamma_k \left[ \frac{1}{\rho} - \mu\eta\gamma_{k-1}^2 \right] = \gamma_{k-1}^2$$

If  $\gamma_k = C$ , then

$$\begin{aligned} \gamma_k &= \frac{1}{\sqrt{\mu\eta\rho}} \\ \beta_k &= 1 - \sqrt{\frac{\mu\eta}{\rho}} \\ b_{k+1} &= \frac{b_0}{\left(1 - \sqrt{\frac{\mu\eta}{\rho}}\right)^{(k+1)/2}} \\ a_{k+1} &= \frac{1}{\sqrt{\mu\eta\rho}} \cdot \sqrt{\eta\rho} \cdot \frac{b_0}{\left(1 - \sqrt{\frac{\mu\eta}{\rho}}\right)^{(k+1)/2}} = \frac{b_0}{\sqrt{\mu}} \cdot \frac{1}{\left(1 - \sqrt{\frac{\mu\eta}{\rho}}\right)^{(k+1)/2}} \end{aligned}$$

If  $b_0 = \sqrt{\mu}$ ,

$$a_{k+1} = \frac{1}{\left(1 - \sqrt{\frac{\mu\eta}{\rho}}\right)^{(k+1)/2}}$$

The above equation implies that  $a_0 = 1$ . This gives us the parameter settings used in Theorem 1.

Using the result of Lemma 3 and the above relations, we obtain the following inequality. Note that  $\phi_{k+1} = \mathbb{E}[f(w_{k+1})]$ .

$$\begin{aligned} \frac{\mu}{\left(1 - \sqrt{\frac{\mu\eta}{\rho}}\right)^{(k+1)}} \cdot \frac{1}{\mu\eta\rho} [\phi_{k+1} - f^*] &\leq \frac{1}{\rho\eta} [f(x_0) - f^*] + \frac{\mu}{2\rho\eta} \|x_0 - w^*\|^2 + \frac{\sigma^2\eta}{\rho} \cdot \frac{1}{\mu\eta\rho} \sum_{i=0}^k \frac{\mu}{\left(1 - \sqrt{\frac{\mu\eta}{\rho}}\right)^{(i+1)}} \\ \frac{1}{\left(1 - \sqrt{\frac{\mu\eta}{\rho}}\right)^k} [\phi_{k+1} - f^*] &\leq [f(x_0) - f^*] + \frac{\mu}{2} \|x_0 - w^*\|^2 + \frac{\sigma^2\eta}{\rho} \sum_{i=0}^k \frac{1}{\left(1 - \sqrt{\frac{\mu\eta}{\rho}}\right)^{(i+1)}} \\ \frac{1}{\left(1 - \sqrt{\frac{\mu\eta}{\rho}}\right)^k} [\phi_{k+1} - f^*] &\leq \left[ f(x_0) - f^* + \frac{\mu}{2} \|x_0 - w^*\|^2 \right] + \frac{\sigma^2\sqrt{\eta}}{\sqrt{\rho\mu}} \left(1 - \sqrt{\frac{\mu\eta}{\rho}}\right)^{-k} \\ [\phi_{k+1} - f^*] &\leq \left(1 - \sqrt{\frac{\mu\eta}{\rho}}\right)^k \left[ f(x_0) - f^* + \frac{\mu}{2} \|x_0 - w^*\|^2 \right] + \frac{\sigma^2\sqrt{\eta}}{\sqrt{\rho\mu}} \end{aligned}$$

### B.1.2 Proof of Theorem 1

We use the above relation to complete the proof for Theorem 1. Substituting  $\eta = \frac{1}{\rho L}$  and  $\sigma = 0$ , we obtain the following:

$$[\mathbb{E}[f(w_{k+1})] - f^*] \leq \left(1 - \sqrt{\frac{\mu\eta}{\rho}}\right)^k \left[f(x_0) - f^* + \frac{\mu}{2} \|x_0 - w^*\|^2\right]$$

### B.1.3 Convex case

We now use the above lemmas to first prove the convergence rate in the convex case. In this case,  $\mu = 0$  and the result of Lemma 4 can be written as:

$$\begin{aligned} \gamma_k^2 - \frac{\gamma_k}{\rho} - \gamma_{k-1}^2 &= 0 \\ \implies \gamma_k &= \frac{\frac{1}{\rho} + \sqrt{\frac{1}{\rho^2} + 4\gamma_{k-1}^2}}{2} \end{aligned}$$

Let  $\gamma_0 = 0$ . From equation 13, for all  $k$ ,

$$\begin{aligned} \beta_k &= 1 \\ b_{k+1} &= b_k = b_0 = 1 && \text{(From equation 15)} \\ a_{k+1} &= \gamma_k \sqrt{\eta \rho} b_0 \implies a_{k+1} = \gamma_k \sqrt{\eta \rho} && \text{(From equation 14)} \end{aligned}$$

The above equation implies that  $a_0 = 0$ . This gives us the parameter settings used in Theorem 2.

Using the result of Lemma 3 by setting  $\mu = 0$  and the above relations, we obtain the following inequality. Note that  $\phi_{k+1} = \mathbb{E}[f(w_{k+1})]$ .

$$\gamma_k^2 [\phi_{k+1} - f^*] \leq \frac{1}{2\rho\eta} \|x_0 - w^*\|^2 + \frac{\sigma^2\eta}{\rho} \sum_{i=1}^{k-1} [\gamma_i^2]$$

By induction,  $\gamma_i \geq \frac{i}{2\rho}$ ,

$$\begin{aligned} \frac{k^2}{4\rho^2} [\phi_{k+1} - f^*] &\leq \frac{1}{2\rho\eta} \|x_0 - w^*\|^2 + \frac{\sigma^2\eta}{4\rho^3} \sum_{i=1}^{k-1} [i^2] \\ [\phi_{k+1} - f^*] &\leq \frac{2\rho}{k^2\eta} \|x_0 - w^*\|^2 + \frac{\sigma^2\eta}{k^2\rho} \sum_{i=1}^{k-1} [i^2] \\ [\phi_{k+1} - f^*] &\leq \frac{2\rho}{k^2\eta} \|x_0 - w^*\|^2 + \frac{k\sigma^2\eta}{\rho} \end{aligned}$$

### B.1.4 Proof of Theorem 2

We use the above relation to complete the proof for Theorem 2. Substituting  $\eta = \frac{1}{\rho L}$  and  $\sigma = 0$ , we obtain the following:

$$[\mathbb{E}[f(w_{k+1})] - f^*] \leq \frac{2\rho^2 L}{k^2} \|x_0 - w^*\|^2$$

## B.2 Proof of Theorem 3

*Proof.* Recall the stochastic gradient descent update,

$$w_{k+1} = w_k - \eta \nabla f(w_k, z_k) \quad (19)$$

By Lipschitz continuity of the gradient,

$$\begin{aligned} f(w_{k+1}) - f(w_k) &\leq \langle \nabla f(w_k), w_{k+1} - w_k \rangle + \frac{L}{2} \|w_{k+1} - w_k\|^2 \\ &\leq -\eta \langle \nabla f(w_k), \nabla f(w_k, z_k) \rangle + \frac{L\eta^2}{2} \|\nabla f(w_k, z_k)\|^2 \end{aligned}$$

Taking expectation wrt  $z_k$  and using equations 9, 10

$$\begin{aligned} \mathbb{E}[f(w_{k+1}) - f(w_k)] &\leq -\eta \|\nabla f(w_k)\|^2 + \frac{L\rho\eta^2}{2} \|\nabla f(w_k)\|^2 + \frac{L\eta^2\sigma^2}{2} \\ \mathbb{E}[f(w_{k+1}) - f(w_k)] &\leq \left[-\eta + \frac{L\rho\eta^2}{2}\right] \|\nabla f(w_k)\|^2 + \frac{L\eta^2\sigma^2}{2} \end{aligned}$$

If  $\eta \leq \frac{1}{\rho L}$ ,

$$\begin{aligned} \mathbb{E}[f(w_{k+1}) - f(w_k)] &\leq \left(\frac{-\eta}{2}\right) \|\nabla f(w_k)\|^2 + \frac{L\eta^2\sigma^2}{2} \\ \implies \|\nabla f(w_k)\|^2 &\leq \left(\frac{2}{\eta}\right) \mathbb{E}[f(w_k) - f(w_{k+1})] + L\eta\sigma^2 \end{aligned} \quad (20)$$

Taking expectation wrt  $z_0, z_1, \dots, z_{t-1}$  and summing from  $k = 0$  to  $t - 1$ ,

$$\begin{aligned} \sum_{k=0}^{t-1} \mathbb{E} \left[ \|\nabla f(w_k)\|^2 \right] &\leq \left(\frac{2}{\eta}\right) \sum_{k=0}^{t-1} \mathbb{E} [f(w_k) - f(w_{k+1})] + L\eta t \sigma^2 \\ \implies \sum_{k=0}^{t-1} \min_{k=0,1,\dots,t-1} \mathbb{E} \left[ \|\nabla f(w_k)\|^2 \right] &\leq \left(\frac{2}{\eta}\right) \sum_{k=0}^{t-1} \mathbb{E} [f(w_k) - f(w_{k+1})] + L\eta\sigma^2 \\ \min_{k=0,1,\dots,t-1} \mathbb{E} \left[ \|\nabla f(w_k)\|^2 \right] &\leq \left(\frac{2}{\eta t}\right) [f(w_0) - \mathbb{E}[f(w_t)]] + L\eta\sigma^2 \\ \min_{k=0,1,\dots,t-1} \mathbb{E} \left[ \|\nabla f(w_k)\|^2 \right] &\leq \left(\frac{2}{\eta t}\right) [f(w_0) - f(w^*)] + L\eta\sigma^2 \end{aligned}$$

If  $\sigma = 0$ ,

$$\begin{aligned} \min_{k=0,1,\dots,t-1} \mathbb{E} \left[ \|\nabla f(w_k)\|^2 \right] &\leq \left(\frac{2}{\eta t}\right) [f(w_0) - f(w^*)] \\ \implies \min_{k=0,1,\dots,t-1} \mathbb{E} \left[ \|\nabla f(w_k)\|^2 \right] &\leq \left(\frac{2\rho L}{t}\right) [f(w_0) - f(w^*)] \end{aligned} \quad (\text{Setting } \eta = \frac{1}{\rho L})$$

□

## B.3 Proof of Theorem 4

*Proof.* Similar to the proof of Theorem 3, we can use the SGD update and Lipschitz continuity of the gradient to obtain the following equation for the stepsize  $\eta \leq \frac{1}{\rho L}$ :

$$\mathbb{E}[f(w_{k+1}) - f(w_k)] \leq \left(\frac{-\eta}{2}\right) \|\nabla f(w_k)\|^2 + \frac{L\eta^2\sigma^2}{2}$$

We now use the PL inequality with constant  $\mu$  as follows:

$$\|\nabla f(w_k)\|^2 \geq 2\mu [f(w_k) - f^*]$$

Combining the above two inequalities,

$$\mathbb{E}[f(w_{k+1}) - f(w_k)] \leq -\eta\mu [f(w_k) - f^*] + \frac{L\eta^2\sigma^2}{2}$$

If  $\sigma = 0$ ,

$$\begin{aligned} \mathbb{E}[f(w_{k+1}) - f(w_k)] &\leq -\eta\mu [f(w_k) - f^*] \\ \implies \mathbb{E}[f(w_{k+1}) - f^*] &\leq (1 - \eta\mu) [f(w_k) - f^*] \end{aligned}$$

Substituting  $\eta = \frac{1}{\rho L}$ ,

$$\begin{aligned} \mathbb{E}[f(w_{k+1}) - f^*] &\leq \left(1 - \frac{\mu}{\rho L}\right) [f(w_k) - f^*] \\ \implies \mathbb{E}[f(w_{k+1}) - f^*] &\leq \left(1 - \frac{\mu}{\rho L}\right)^k [f(w_0) - f^*] \end{aligned}$$

(21)

□

#### B.4 Proof of Theorem 5

*Proof.*

$$\begin{aligned} \|w_{k+1} - w^*\|^2 &= \|w_k - \eta\nabla f(w_k, z) - w^*\|^2 \\ &= \|w_k - w^*\|^2 - 2\eta\langle \nabla f(w_k, z), w_k - w^* \rangle + \eta^2 \|\nabla f(w_k, z)\|^2 \\ \mathbb{E}_z[\|w_{k+1} - w^*\|^2] &= \|w_k - w^*\|^2 - 2\eta\mathbb{E}[\langle \nabla f(w_k, z), w_k - w^* \rangle] + \eta^2\mathbb{E}[\|\nabla f(w_k, z)\|^2] \\ &= \|w_k - w^*\|^2 - 2\eta\langle \nabla f(w_k), w_k - w^* \rangle + \eta^2\mathbb{E}[\|\nabla f(w_k, z)\|^2] \\ &\quad \text{(From the unbiasedness of stochastic gradients.)} \\ &\leq \|w_k - w^*\|^2 - 2\eta\langle \nabla f(w_k), w_k - w^* \rangle + 2\rho\eta^2L[f(w_k) - f^*] \quad \text{(From equation 6)} \\ &\leq \|w_k - w^*\|^2 + 2\eta\left[f^* - f(w_k) - \frac{\mu}{2}\|w_k - w^*\|^2\right] + 2\rho\eta^2L[f(w_k) - f^*] \\ &\quad \text{(By strong convexity)} \\ &= (1 - \mu\eta)\|w_k - w^*\|^2 + (2\eta^2\rho L - 2\eta)[f(w_k) - f^*] \\ \|w_{k+1} - w^*\|^2 &\leq \left(1 - \frac{\mu}{\rho L}\right)\|w_k - w^*\|^2 \quad \text{(Setting } \eta = \frac{1}{\rho L}\text{)} \\ \implies \|w_{k+1} - w^*\|^2 &\leq \left(1 - \frac{\mu}{\rho L}\right)^k \|x_0 - w^*\|^2 \end{aligned}$$

□

#### B.5 Proof of Theorem 6

*Proof.*

By convexity,

$$f(w_k) \leq f(w^*) + \langle \nabla f(w_k), w_k - w^* \rangle$$



For any  $\beta \leq 1$ ,

$$f(w_k) \leq \beta f(w_k) + (1 - \beta)f(w^*) + (1 - \beta)\langle \nabla f(w_k), w_k - w^* \rangle$$

By Lipschitz continuity of  $\nabla f(f)$ ,

$$\begin{aligned} f(w_{k+1}) &\leq f(w_k) + \langle \nabla f(w_k), w_{k+1} - w_k \rangle + \frac{L}{2} \|w_{k+1} - w_k\|^2 \\ \implies f(w_{k+1}) &\leq f(w_k) - \eta \langle \nabla f(w_k), \nabla f(w_k, z) \rangle + \frac{\eta^2 L}{2} \|\nabla f(w_k, z)\|^2 \end{aligned}$$

From the above equations,

$$f(w_{k+1}) \leq \beta f(w_k) + (1 - \beta)f(w^*) + (1 - \beta)\langle \nabla f(w_k), w_k - w^* \rangle - \eta \langle \nabla f(w_k), \nabla f(w_k, z) \rangle + \frac{\eta^2 L}{2} \|\nabla f(w_k, z)\|^2$$

Note that,

$$\begin{aligned} \frac{1}{2\eta} \left( \|w_k - w^*\|^2 - \|w_{k+1} - w^*\|^2 \right) &= \frac{1}{2\eta} \left( \|w_k - w^*\|^2 - \|w_k - \eta \nabla f(w_k, z) - w^*\|^2 \right) \\ &= \frac{1}{2\eta} \left( \|w_k - w^*\|^2 - \|w_k - w^*\|^2 - \eta^2 \|\nabla f(w_k, z)\|^2 + 2\eta \langle w_k - w^*, \nabla f(w_k, z) \rangle \right) \\ \frac{1}{2\eta} \left( \|w_k - w^*\|^2 - \|w_{k+1} - w^*\|^2 \right) &= \frac{-\eta}{2} \|\nabla f(w_k, z)\|^2 + \langle w_k - w^*, \nabla f(w_k, z) \rangle \\ \implies \langle w_k - w^*, \nabla f(w_k, z) \rangle &= \frac{1}{2\eta} \left( \|w_k - w^*\|^2 - \|w_{k+1} - w^*\|^2 \right) + \frac{\eta}{2} \|\nabla f(w_k, z)\|^2 \end{aligned}$$

Taking expectation

$$\begin{aligned} \mathbb{E}[\langle w_k - w^*, \nabla f(w_k, z) \rangle] &= \frac{1}{2\eta} \left( \|w_k - w^*\|^2 - \mathbb{E}[\|w_{k+1} - w^*\|^2] \right) + \frac{\eta}{2} \mathbb{E}[\|\nabla f(w_k, z)\|^2] \\ \implies \langle w_k - w^*, \nabla f(w_k) \rangle &= \frac{1}{2\eta} \left( \|w_k - w^*\|^2 - \mathbb{E}[\|w_{k+1} - w^*\|^2] \right) + \frac{\eta}{2} \mathbb{E}[\|\nabla f(w_k, z)\|^2] \end{aligned}$$

Using the above equations,

$$\begin{aligned} f(w_{k+1}) &\leq \beta f(w_k) + (1 - \beta)f(w^*) + \frac{1 - \beta}{2\eta} \left( \|w_k - w^*\|^2 - \mathbb{E}[\|w_{k+1} - w^*\|^2] \right) + \frac{(1 - \beta)(\eta)}{2} \mathbb{E}[\|\nabla f(w_k, z)\|^2] \\ &\quad - \eta \langle \nabla f(w_k), \nabla f(w_k, z) \rangle + \frac{\eta^2 L}{2} \|\nabla f(w_k, z)\|^2 \end{aligned}$$

Taking expectation,

$$\begin{aligned} \mathbb{E}[f(w_{k+1})] &\leq \beta f(w_k) + (1 - \beta)f(w^*) + \frac{1 - \beta}{2\eta} \left( \|w_k - w^*\|^2 - \mathbb{E}[\|w_{k+1} - w^*\|^2] \right) + \frac{(1 - \beta)(\eta)}{2} \mathbb{E}[\|\nabla f(w_k, z)\|^2] \\ &\quad - \eta \langle \nabla f(w_k), \mathbb{E}[\nabla f(w_k, z)] \rangle + \frac{\eta^2 L}{2} \mathbb{E}[\|\nabla f(w_k, z)\|^2] \\ &= \beta f(w_k) + (1 - \beta)f(w^*) + \frac{1 - \beta}{2\eta} \left( \|w_k - w^*\|^2 - \mathbb{E}[\|w_{k+1} - w^*\|^2] \right) + \frac{(1 - \beta)(\eta)}{2} \mathbb{E}[\|\nabla f(w_k, z)\|^2] \\ &\quad - \eta \|\nabla f(w_k)\|^2 + \frac{\eta^2 L}{2} \mathbb{E}[\|\nabla f(w_k, z)\|^2] \end{aligned}$$

The term  $-\eta \|\nabla f(w_k)\|^2 \leq 0$

$$\begin{aligned} \implies \mathbb{E}[f(w_{k+1})] &\leq \beta f(w_k) + (1-\beta)f(w^*) + \frac{1-\beta}{2\eta} \left( \|w_k - w^*\|^2 - \mathbb{E}[\|w_{k+1} - w^*\|^2] \right) \\ &\quad + \frac{(1-\beta)\eta}{2} \mathbb{E}[\|\nabla f(w_k, z)\|^2] + \frac{\eta^2 L}{2} \mathbb{E}[\|\nabla f(w_k, z)\|^2] \\ \mathbb{E}[f(w_{k+1})] - f(w^*) &\leq \beta (f(w_k) - f(w^*)) + \frac{1-\beta}{2\eta} \left( \|w_k - w^*\|^2 - \mathbb{E}[\|w_{k+1} - w^*\|^2] \right) \\ &\quad + \left( \frac{(1-\beta)\eta}{2} + \frac{\eta^2 L}{2} \right) \mathbb{E}[\|\nabla f(w_k, z)\|^2] \end{aligned}$$

From equation 6,

$$\begin{aligned} \mathbb{E}[f(w_{k+1})] - f(w^*) &\leq \beta (f(w_k) - f(w^*)) + \frac{1-\beta}{2\eta} \left( \|w_k - w^*\|^2 - \mathbb{E}[\|w_{k+1} - w^*\|^2] \right) \\ &\quad + (\rho(1-\beta)\eta L + \eta^2 \rho L^2) (f(w_k) - f(w^*)) \end{aligned}$$

Let us choose  $1-\beta = \eta L$ ,

$$\begin{aligned} \mathbb{E}[f(w_{k+1})] - f(w^*) &\leq \beta (f(w_k) - f(w^*)) + \frac{1-\beta}{2\eta} \left( \|w_k - w^*\|^2 - \mathbb{E}[\|w_{k+1} - w^*\|^2] \right) + 2\rho\eta^2 L^2 (f(w_k) - f(w^*)) \\ \mathbb{E}[f(w_{k+1})] - f(w^*) &\leq (\beta + 2\rho\eta^2 L^2) (f(w_k) - f(w^*)) + \frac{L}{2} \left( \|w_k - w^*\|^2 - \mathbb{E}[\|w_{k+1} - w^*\|^2] \right) \end{aligned}$$

Let  $\delta_{k+1} = \mathbb{E}[f(w_{k+1})] - f(w^*)$  and  $\Delta_{k+1} = \mathbb{E}[\|w_{k+1} - w^*\|^2]$

$$\implies \delta_{k+1} \leq (\beta + 2\rho\eta^2 L^2) \delta_k + \frac{L}{2} [\Delta_k - \Delta_{k+1}]$$

Summing from  $i = 0$  to  $k-1$ ,

$$\begin{aligned} \sum_{i=0}^{k-1} \delta_{i+1} &\leq (\beta + 2\rho\eta^2 L^2) \sum_{i=0}^{k-1} \delta_i + \frac{L}{2} \sum_{i=0}^{k-1} [\Delta_i - \Delta_{i+1}] \\ \implies \sum_{i=0}^{k-1} \delta_{i+1} &\leq (\beta + 2\rho\eta^2 L^2) \sum_{i=0}^{k-1} \delta_i + \frac{L}{2} \Delta_0 \\ \implies \sum_{i=1}^k \delta_i &\leq \frac{(\beta + 2\rho\eta^2 L^2) \delta_0 + \frac{L}{2} \Delta_0}{(1-\beta - 2\rho\eta^2 L^2)} \end{aligned}$$

Let  $\bar{w}_k = \frac{[\sum_{i=1}^k w_i]}{k}$ . By Jensen's inequality,

$$\begin{aligned} \mathbb{E}[f(\bar{w}_k)] &\leq \frac{\sum_{i=1}^k \mathbb{E}[f(w_i)]}{k} \\ \implies \mathbb{E}[f(\bar{w}_k)] - f(w^*) &\leq \sum_{i=1}^k \delta_i \\ \implies \mathbb{E}[f(\bar{w}_k)] - f(w^*) &\leq \frac{(\beta + 2\rho\eta^2 L^2) \delta_0 + \frac{L}{2} \Delta_0}{(1-\beta - 2\rho\eta^2 L^2) k} \\ \mathbb{E}[f(\bar{w}_k)] - f(w^*) &\leq \frac{(1-\eta L + 2\rho\eta^2 L^2) [f(w_0) - f(w^*)] + \frac{L}{2} \|w_0 - w^*\|^2}{(\eta L - 2\rho\eta^2 L^2) k} \end{aligned} \quad (\text{Since } 1-\beta = \eta L)$$

If  $\eta = \frac{1}{4\rho L}$ ,

$$\begin{aligned} \mathbb{E}[f(\bar{w}_k)] - f(w^*) &\leq \frac{\frac{7}{8\rho} [f(w_0) - f(w^*)] + \frac{L}{2} \|w_0 - w^*\|^2}{\frac{1}{8\rho} k} \\ \mathbb{E}[f(\bar{w}_k)] - f(w^*) &\leq \frac{7 [f(w_0) - f(w^*)] + 4\rho L \|w_0 - w^*\|^2}{k} \\ \mathbb{E}[f(\bar{w}_k)] - f(w^*) &\leq \frac{(7L/2) \|w_0 - w^*\|^2 + 4\rho L \|w_0 - w^*\|^2}{k} \\ \implies \mathbb{E}[f(\bar{w}_k)] - f(w^*) &\leq \frac{4(1 + \rho) \|w_0 - w^*\|^2}{k} \end{aligned}$$

□

## B.6 Proof for Proposition 1

*Proof.*

For the first part, we use the PL inequality which states the for all  $w$ ,

$$2 [f(w) - f(w^*)] \leq \frac{1}{\mu} \|\nabla f(w)\|^2$$

Combining this with the WGC gives us the desired result

For the converse, we use smoothness and the convexity of  $f(\cdot)$ . Specifically, for all points  $a, b$ ,

$$f(a) - f(b) \geq \langle \nabla f(b), a - b \rangle + \frac{1}{2L} \|\nabla f(a) - \nabla f(b)\|^2$$

Substituting  $a = w$  and  $b = w^*$  and rearranging,

$$\|\nabla f(w)\|^2 \leq 2L \cdot [f(w) - f(w^*)]$$

Combining this with the SGC gives us the desired result.

□

## B.7 Proof for Proposition 2

*Proof.*

$$\mathbb{E}_i \|\nabla f_i(w)\|^2 = \frac{1}{n} \sum_{i=1}^n \|\nabla f_i(w)\|^2 \tag{22}$$

By Lipschitz continuity of  $\nabla f_i(w)$  and convexity,

$$f_i(w) - f_i(w^*) \geq \langle \nabla f_i(w^*), w - w^* \rangle + \frac{1}{2L_i} \|\nabla f_i(w) - \nabla f_i(w^*)\|^2$$

For all  $i$ ,  $\nabla f_i(w^*) = \nabla f(w^*) = 0$ . Hence,

$$\begin{aligned} f_i(w) - f_i(w^*) &\geq \frac{1}{2L_i} \|\nabla f_i(w)\|^2 \\ \implies \|\nabla f_i(w)\|^2 &\leq 2L_i [f_i(w) - f_i(w^*)] \end{aligned}$$

Using Equation 22,

$$\begin{aligned} \mathbb{E}_i \|\nabla f_i(w)\|^2 &\leq \sum_{i=1}^n \left[ \frac{2L_i}{n} [f_i(w) - f_i(w^*)] \right] \\ &\leq \frac{2L_{max}}{n} \sum_{i=1}^n [f_i(w) - f_i(w^*)] \\ \mathbb{E}_i \|\nabla f_i(w)\|^2 &\leq 2L_{max} [f(w) - f(w^*)] \end{aligned} \tag{23}$$

□

## B.8 Proof for Lemma 1

*Proof.* Let  $a = y \cdot x$ . For the squared-hinge loss, the strong growth condition is equivalent to

$$\begin{aligned} \mathbb{E}[(1 - w^\top a)_+^2] &\leq \rho \|\mathbb{E}[(1 - w^\top a)_+ a]\|^2 \\ \|\mathbb{E}[(1 - w^\top a)_+ a]\| &\geq \frac{1}{\|w_*\|} \mathbb{E}[(1 - w^\top a)_+ a^\top w_*] \\ &\geq \tau \mathbb{E}[(1 - w^\top a)_+] \end{aligned}$$

We thus need to upper bound  $\mathbb{E}[(1 - w^\top a)_+^2]$  by a constant  $c$  times  $(\mathbb{E}[(1 - w^\top a)_+])^2$ . We must have  $c \geq 1$  (as a consequence of Jensen's inequality). Then we have  $\rho = c/\tau^2$ . Next, we prove that if the distribution of  $a$  is uniform over  $\kappa$  values, then  $c = \kappa$ .

Consider a random variable  $A \in \mathbb{R}_+$  taking  $\kappa$  values  $a_1, \dots, a_\kappa$  with probabilities  $p_1, \dots, p_\kappa$ . Then  $(\mathbb{E}A)^2 = \sum_{i,j} p_i p_j a_i a_j \geq \sum_i a_i^2 p_i^2 \geq \min_i p_i \sum_i a_i^2 p_i$ . □

## B.9 Proof for Lemma 2

*Proof.* Let  $a = y \cdot x$ .

$$\begin{aligned} \mathbb{P}(a^\top w \leq 0) &\leq \mathbb{P}((1 - a^\top w)_+^2 \geq 1) \\ &\leq \mathbb{E}(1 - a^\top w)_+^2 \\ \implies \mathbb{P}(a^\top w \leq 0) &\leq \mathbb{E}f(w, a) \end{aligned}$$

□

## C Additional experimental results

In this section, we propose to use a line-search heuristic for both constant step-size SGD and its accelerated variant. For SGD, we use the line-search proposed in SAG [31]: start with an initial estimate  $\hat{L} = 1$  and in each iteration, we double the estimate when the condition  $f_k\left(w_k - \frac{1}{\hat{L}} \nabla f_k(w_k)\right) \leq f_k(w_k) - \frac{1}{2\hat{L}} \|\nabla f_k(w_k)\|^2$  is not satisfied. We denote this variant as SGD(LS) and the corresponding variant that uses a  $1/L$  step-size as SGD(T). For the accelerated case, we use the same line-search procedure as above, but search for an appropriate value of  $\rho L$ . We denote the accelerated variant with and without line-search as Acc-SGD(LS) and Acc-SGD(T) respectively.

We make the following observations: (i) Accelerated SGD in conjunction with our line-search heuristic is stable across datasets. (ii) Acc-SGD(LS) either matches or outperforms Acc-SGD(T). (iii) In some cases, SGD(LS) can result in faster empirical convergence as compared to the accelerated variants. We plan to investigate better line-search methods for both SGD [31] and Acc-SGD [21] in the future.

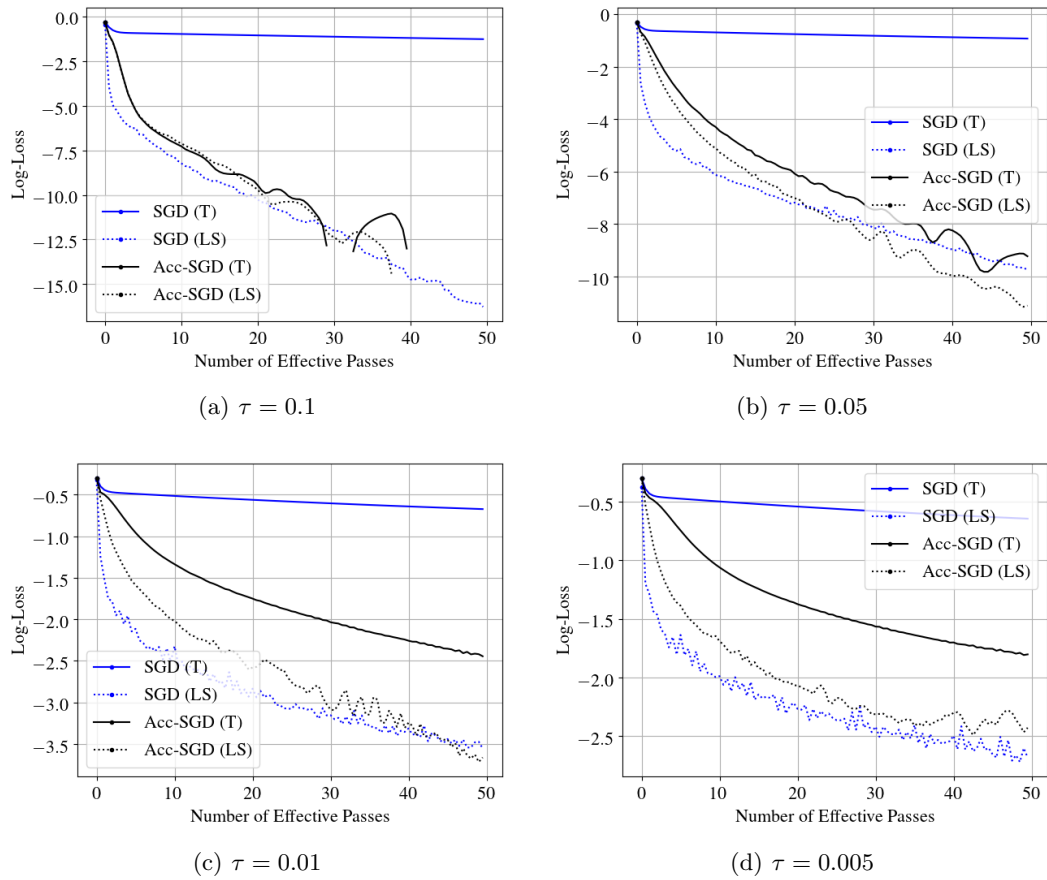

Figure 3: Comparison of SGD and variants of accelerated SGD on a synthetic linearly separable dataset with margin  $\tau$ .

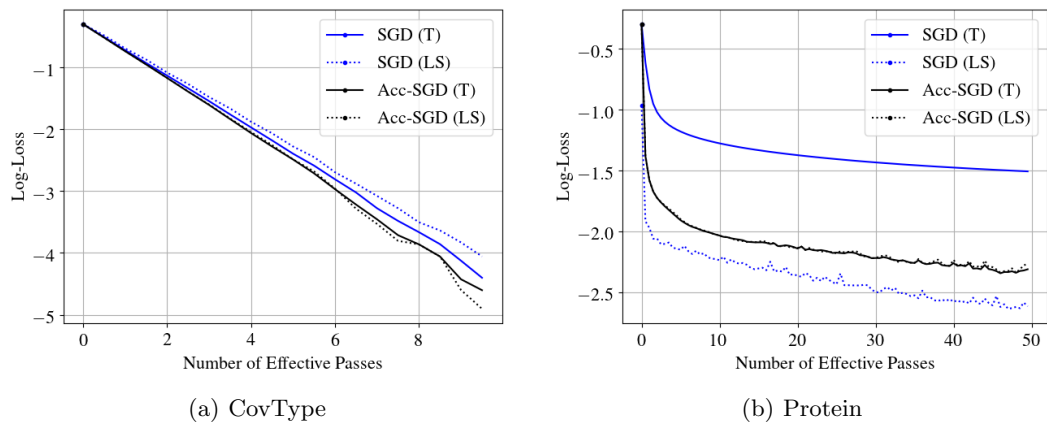

Figure 4: Comparison of SGD and accelerated SGD for learning a linear classifier with RBF features on the (a) CovType and (b) Protein datasets.
